# Supplementary material
Source: publisher figshare collection journal article supplement (https://asha.figshare.com/articles/dataset/_/6170387)
Supplement: Supplementary file 1 [file 1]

*Individual participant characteristics with respect to age, grammatical production (LuMat: raw score max. 41 and MLU<sub>w</sub> (words/utterances)) grammatical comprehension (TROG: raw score max. 20 (percentile based on Swedish norms)), productive vocabulary (Viborg materialet: raw score max. 51 (percentile)), and nonword repetition (points max. 30).*

| <b>Code name</b> | <b>Age in months</b> | <b>LuMat</b> | <b>MLU<sub>w</sub></b> | <b>TROG</b> | <b>Viborg materialet</b> | <b>Nonword repetition</b> |
|------------------|----------------------|--------------|------------------------|-------------|--------------------------|---------------------------|
| Sofus (SLI_1)    | 76                   | 9.5          | 2.16 (261/121)         | 9 (=10)     | 27 (<25)                 | 6                         |
| Anton (TDA_1)    | 77                   | 34.0         | 4.15 (1278/308)        | 17 (=90)    | 38 (25<)                 | 27                        |
| Leonard (TDL_1)  | 52                   | 29.5         | 3.69 (1000/271)        | 13 (90<)    | 28 (50<)                 | 16                        |
| Selina (SLI_2)   | 86                   | 27.0         | 3.73 (1160/311)        | 13 (=25)    | 27 (<25)                 | 15                        |
| Amanda (TDA_2)   | 87                   | 38.0         | 5.30 (1065/201)        | 19 (=95)    | 40 (25<)                 | 28                        |
| Laura (TDL_2)    | 44                   | 27.5         | 3.67 (1223/333)        | 5 (25<)     | 28 (75<)                 | -                         |
| Sam (SLI_3)      | 83                   | 21.5         | 2.68 (461/172)         | 8 (<10)     | 28 (<25)                 | 11                        |
| Anders (TDA_3)   | 83                   | 34.0         | 4.09 (389/95)          | 13 (25<)    | 42 (=75)                 | 27                        |
| Lucas (TDL_3)    | 53                   | 31.0         | 4.57 (492/108)         | 12 (=90)    | 31 (=75)                 | 21                        |
| Severin (SLI_4)  | 95                   | 26.0         | 2.92 (336/115)         | 11 (10<)    | 38 (<25)                 | 12                        |
| Alvin (TDA_4)    | 93                   | 35.0         | 3.90 (745/191)         | 16 (50<)    | 42 (25<)                 | 24                        |
| Laurits (TDL_4)  | 67                   | 37.5         | 4.82 (1026/213)        | 12 (50<)    | 35 (25<)                 | 21 of 24                  |
| Sisse (SLI_5)    | 84                   | 27.0         | 2.36 (383/162)         | 13 (25<)    | 31 (<25)                 | 3                         |
| Anke (TDA_5)     | 84                   | 37.0         | 4.84 (1419/293)        | 16 (=75)    | 40 (25<)                 | 21                        |
| Linda (TDL_5)    | 55                   | 29.5         | 4.04 (941/233)         | 9 (=25)     | 28 (50<)                 | 24                        |
| Sune (SLI_6)     | 68                   | 28.0         | 3.25 (703/216)         | 10 (25<)    | 34 (25<)                 | 8                         |
| Absalon (TDA_6)  | 68                   | 36.5         | 4.20 (1456/347)        | 16 (=95)    | 41 (=75)                 | 25                        |
| Ludvig (TDL_6)   | 49                   | 31.5         | 3.86 (536/139)         | 15 (90<)    | 33 (50<)                 | 19                        |

*Individual participant characteristics... continued*

| <b>Code name</b> | <b>Age in months</b> | <b><i>LuMat</i></b> | <b>MLU<sub>w</sub></b> | <b><i>TROG</i></b> | <b><i>Viborg materialet</i></b> | <b>Nonword repetition</b> |
|------------------|----------------------|---------------------|------------------------|--------------------|---------------------------------|---------------------------|
| Simon (SLI_7)    | 70                   | 28.0                | 3.16 (576/182)         | 12 (=50)           | 17 (<25)                        | 16                        |
| Asger (TDA_7)    | 68                   | 34.5                | 4.36 (1082/248)        | 13 (50<)           | 43 (75<)                        | 23                        |
| Laurens (TDL_7)  | 49                   | 28.5                | 4.33 (810/187)         | 11 (90<)           | 22 (25<)                        | 17                        |
| Sara (SLI_9)     | 84                   | 14.0                | 2.17 (321/148)         | 10 (=10)           | 24 (<25)                        | 5                         |
| Anne (TDA_9)     | 84                   | 38.0                | 4.13 (413/100)         | 16 (50<)           | 46 (75<)                        | 23                        |
| Lina (TDL_9)     | 42                   | 26.0                | 3.43 (905/264)         | 8 (=75)            | 25 (50<)                        | 26                        |
| Samuel (SLI_10)  | 66                   | 19.0                | 2.65 (659/249)         | 13 (50<)           | 26 (<25)                        | 4                         |
| Anker (TDA_10)   | 66                   | 38.0                | 5.15 (613/119)         | 13 (50<)           | 38 (50<)                        | 26                        |
| Leon (TDL_10)    | 48                   | 22.5                | 3.81 (609/160)         | 7 (50<)            | 23 (25<)                        | 11                        |
| Sigurt (SLI_11)  | 63                   | 20.0                | 2.79 (724/260)         | 12 (50<)           | 29 (<25)                        | 15                        |
| Aksel (TDA_11)   | 63                   | 37.5                | 4.88 (854/175)         | 13 (=75)           | 38 (=75)                        | 22                        |
| Lambert (TDL_11) | 50                   | 31.0                | 4.10 (985/240)         | 12 (90<)           | 28 (50<)                        | 12 of 24                  |
| Silas (SLI_12)   | 62                   | 20.0                | 2.92 (1101/377)        | 9 (25<)            | 25 (<25)                        | -                         |
| Adrian (TDA_12)  | 62                   | 32.0                | 3.57 (496/139)         | 11 (=50)           | 30 (=25)                        | 18                        |
| Lorens (TDL_12)  | 49                   | 29.0                | 3.92 (545/131)         | -                  | 22 (25<)                        | 14                        |
