# Supplementary material
Source: publisher figshare collection journal article supplement (https://asha.figshare.com/articles/dataset/_/6170387)
Supplement: Supplementary file 2 [file 1]

*Individual characteristics with respect to parents' language disorders (difficulties with spoken or written language) and parents' education (1=untrained worker, 2= trained worker, 3= college degree, 4= university degree, - = no information).*

| <b>Code name</b> | <b>Parents' language disorders</b> | <b>Mothers' education</b> | <b>Fathers' education</b> |
|------------------|------------------------------------|---------------------------|---------------------------|
| Sofus (SLI_1)    | Yes (father)                       | 2                         | 2                         |
| Anton (TDA_1)    | No                                 | -                         | 4                         |
| Leonard (TDL_1)  | No                                 | 2                         | 2                         |
| Selina (SLI_2)   | Yes (mother)                       | 2                         | -                         |
| Amanda (TDA_2)   | No                                 | 4                         | 4                         |
| Laura (TDL_2)    | No                                 | 4                         | 4                         |
| Sam (SLI_3)      | Yes (both parents)                 | 4                         | 4                         |
| Anders (TDA_3)   | No                                 | 4                         | 4                         |
| Lucas (TDL_3)    | No                                 | 4                         | 3                         |
| Severin (SLI_4)  | Yes (mother)                       | 1                         | 1                         |
| Alvin (TDA_4)    | No                                 | 3                         | 4                         |
| Laurits (TDL_4)  | Yes (father)                       | 3                         | 2                         |
| Sisse (SLI_5)    | Yes (father)                       | 2                         | 1                         |
| Anke (TDA_5)     | No                                 | 4                         | 2                         |
| Linda (TDL_5)    | No                                 | 3                         | 2                         |
| Sune (SLI_6)     | Yes (father)                       | 2                         | 2                         |
| Absalon (TDA_6)  | No                                 | 4                         | 4                         |
| Ludvig (TDL_6)   | No                                 | 2                         | 2                         |
| Simon (SLI_7)    | Yes (mother)                       | 2                         | 2                         |
| Asger (TDA_7)    | Yes (mother)                       | 2                         | 2                         |
| Laurens (TDL_7)  | No                                 | 1                         | -                         |

*Individual characteristics with respect to parents' language disorders... continued*

| <b>Code name</b> | <b>Parents' language disorders</b> | <b>Mothers' education</b> | <b>Fathers' education</b> |
|------------------|------------------------------------|---------------------------|---------------------------|
| Sara (SLI_9)     | Yes (both parents)                 | 1                         | 1                         |
| Anne (TDA_9)     | No                                 | 3                         | 4                         |
| Lina (TDL_9)     | Yes (mother)                       | 3                         | 2                         |
| Samuel (SLI_10)  | No                                 | 2                         | 2                         |
| Anker (TDA_10)   | No                                 | 3                         | 2                         |
| Leon (TDL_10)    | No                                 | 3                         | 2                         |
| Sigurt (SLI_11)  | Yes (father)                       | 1                         | 1                         |
| Aksel (TDA_11)   | No                                 | 4                         | 4                         |
| Lambert (TDL_11) | Yes (both parents)                 | 3                         | 2                         |
| Silas (SLI_12)   | No                                 | 3                         | 2                         |
| Adrian (TDA_12)  | Yes (father)                       | 3                         | 2                         |
| Lorens (TDL_12)  | Yes (mother)                       | 1                         | 2                         |
